# Supplementary material for: Modulation of tau tubulin kinases (TTBK1 and TTBK2) impacts ciliogenesis
Source: PubMed Central journal article supplement (PMC10104807; doi:10.1038/s41598-023-32854-4), 2023-04-14
Supplement: 41598_2023_32854_MOESM1_ESM.pdf [file 41598_2023_32854_MOESM1_ESM.pdf]

## Supporting Information

### Modulation of Tau Tubulin Kinases (TTBK1 and TTBK2) Impacts Ciliogenesis

Frances M. Potjewyd<sup>1</sup>, Ariana B. Marquez<sup>2</sup>, Apirat Chaikuad<sup>3,4</sup>, Stefanie Howell<sup>1</sup>, Andrea S. Dunn<sup>5</sup>, Alvaro A. Beltran<sup>2,6</sup>, Jeffery L. Smith<sup>1</sup>, David H. Drewry<sup>1,7</sup>, Adriana S. Beltran<sup>2,8</sup>, Alison D. Axtman<sup>\*,1</sup>

<sup>1</sup> Structural Genomics Consortium, UNC Eshelman School of Pharmacy, University of North Carolina at Chapel Hill, Chapel Hill, NC, 27599, USA

<sup>2</sup> Human Pluripotent Cell Core, University of North Carolina at Chapel Hill, Chapel Hill, NC 27599, USA

<sup>3</sup> Institute of Pharmaceutical Chemistry, Goethe University Frankfurt, Max-von-Laue-Str. 9, D-60438 Frankfurt, Germany

<sup>4</sup> Structural Genomics Consortium, Buchmann Institute for Life Sciences, Goethe University Frankfurt, Max-von-Laue-Strabe 15, D-60438 Frankfurt, Germany

<sup>5</sup> Department of Computer Science, University of North Carolina at Chapel Hill, Chapel Hill, NC 27599, USA

<sup>6</sup> Neuroscience Center, University of North Carolina at Chapel Hill, Chapel Hill, NC 27599, USA

<sup>7</sup> UNC Lineberger Comprehensive Cancer Center, School of Medicine, University of North Carolina at Chapel Hill, Chapel Hill, NC, 27599, USA

<sup>8</sup> Department of Genetics, University of North Carolina at Chapel Hill, Chapel Hill, NC 27599, USA

\* Corresponding author e-mail: [alison.axtman@unc.edu](mailto:alison.axtman@unc.edu)

### Table of Contents

|                                    |         |
|------------------------------------|---------|
| Table S1                           | S2      |
| Table S2                           | S2      |
| Table S3                           | S3      |
| Figure S1                          | S4      |
| Figure S2                          | S5      |
| Figure S3                          | S6      |
| Figure S4                          | S7      |
| Figure S5                          | S8      |
| Figure S6                          | S9      |
| Figure S7                          | S10     |
| Figure S8                          | S11     |
| Figure S9                          | S12     |
| Figure S10                         | S13     |
| Chemistry experimental details     | S14–S15 |
| Compound purity traces and spectra | S16–S20 |
| References                         | S21     |

**Table S1. Enzymatic Profiling of Indolyl Pyrimidinamine Library in Targeted Kinase Panel.**

| Compound     | PoC at 1 $\mu$ M <sup>[a]</sup> |        |                      |                      |                     |      |                     |                     |                      |                      |       |                      |                      |                      |                      |                      |                      |
|--------------|---------------------------------|--------|----------------------|----------------------|---------------------|------|---------------------|---------------------|----------------------|----------------------|-------|----------------------|----------------------|----------------------|----------------------|----------------------|----------------------|
|              | HIPK1 <sup>[b]</sup>            | MAP4K5 | MARK3 <sup>[b]</sup> | MARK4 <sup>[b]</sup> | PAK3 <sup>[b]</sup> | PAK4 | PAK5 <sup>[b]</sup> | PAK6 <sup>[b]</sup> | TAOK1 <sup>[b]</sup> | TAOK2 <sup>[b]</sup> | TAOK3 | TSSK1 <sup>[b]</sup> | TSSK2 <sup>[b]</sup> | TSSK3 <sup>[b]</sup> | TSSK4 <sup>[b]</sup> | TTBK1 <sup>[b]</sup> | TTBK2 <sup>[b]</sup> |
| <b>1</b>     | 76                              | 3      | 56                   | 53                   | 86                  | 58   | 48                  | 51                  | 5                    | 28                   | 11    | 48                   | 88                   | 11                   | 55                   | 78                   | 43                   |
| <b>AMG28</b> | 67                              | 1      | 12                   | 18                   | 86                  | 8    | 3                   | 6                   | 2                    | 26                   | 9     | 10                   | 57                   | 1                    | 70                   | 50                   | 20                   |
| <b>2</b>     | 96                              | 9      | 76                   | 86                   | 100                 | 67   | 87                  | 77                  | 65                   | 83                   | 78    | 82                   | 76                   | 120                  | 77                   | 92                   | 69                   |
| <b>3</b>     | 87                              | 1      | 46                   | 43                   | 104                 | 30   | 31                  | 40                  | 7                    | 12                   | 20    | 30                   | 78                   | 5                    | 78                   | 43                   | 24                   |
| <b>4</b>     | 77                              | 2      | 52                   | 48                   | 81                  | 21   | 27                  | 18                  | 11                   | 33                   | 20    | 46                   | 82                   | 24                   | 75                   | 78                   | 64                   |
| <b>5</b>     | 69                              | -1     | 27                   | 37                   | 89                  | 10   | 8                   | 13                  | 2                    | 8                    | 9     | 8                    | 55                   | 13                   | 86                   | 68                   | 72                   |
| <b>6</b>     | 30                              | 1      | 31                   | 37                   | 89                  | 22   | 26                  | 36                  | 1                    | 9                    | 11    | 57                   | 91                   | 36                   | 103                  | 91                   | 76                   |
| <b>7</b>     | 56                              | 3      | 84                   | 84                   | 110                 | 31   | 39                  | 40                  | 24                   | 21                   | 28    | 98                   | 93                   | 34                   | 103                  | 86                   | 104                  |
| <b>8</b>     | 84                              | 6      | 83                   | 73                   | 117                 | 66   | 77                  | 82                  | 22                   | 55                   | 44    | 73                   | 77                   | 59                   | 94                   | 85                   | 103                  |
| <b>9</b>     | 124                             | 2      | 77                   | 60                   | 103                 | 36   | 60                  | 40                  | 36                   | 31                   | 43    | 38                   | 76                   | 5                    | 102                  | 41                   | 17                   |
| <b>10</b>    | 89                              | 1      | 48                   | 39                   | 117                 | 12   | 17                  | 14                  | 9                    | 14                   | 18    | 16                   | 58                   | -3                   | 88                   | 37                   | 18                   |
| <b>11</b>    | 96                              | 9      | 104                  | 103                  | 100                 | 91   | 88                  | 92                  | 73                   | 44                   | 89    | 89                   | 86                   | 75                   | 101                  | 117                  | 110                  |

<sup>a</sup> Compounds tested at a single concentration (1  $\mu$ M) in duplicate. <sup>b</sup> IDG kinase

**Table S2. Enzymatic and NanoBRET Follow-up of Kinases Potently Inhibited by 9.**

| Kinase <sup>[a]</sup>  | DiscoverX PoC value | Assay format | IC <sub>50</sub> (nM) |
|------------------------|---------------------|--------------|-----------------------|
| CHK2                   | 22                  | Enzymatic    | 4100                  |
| CLK2                   | 27                  | Enzymatic    | 2800                  |
| CRIK                   | 30                  | Enzymatic    | >10000                |
| CSNK1D                 | 21                  | Enzymatic    | 420                   |
| CSNK1E                 | 13                  | Enzymatic    | 820                   |
| MAP4K5                 | 21                  | Enzymatic    | 6.0                   |
| MKK4                   | 3.5                 | Enzymatic    | >10000                |
| MYLK4 <sup>[b]</sup>   | 2.4                 | Enzymatic    | 90                    |
| PIKfyve <sup>[c]</sup> | 0                   | Enzymatic    | 1.8                   |
| PI5P4Ky <sup>[d]</sup> | 15                  | NanoBRET     | 580                   |
| PIP5K1C                | 0                   | Enzymatic    | 2100                  |
| PKD3                   | 0                   | Enzymatic    | 1100                  |
| RIPK5 <sup>[b]</sup>   | 4.1                 | Enzymatic    | 1300                  |
| STK16                  | 28                  | Enzymatic    | 300                   |
| TAOK1                  | 24                  | Enzymatic    | 780                   |
| TAOK2                  | 66                  | Enzymatic    | 860                   |
| TSSK3                  | 24                  | Enzymatic    | 240                   |
| TTBK1                  | ND <sup>[e]</sup>   | Enzymatic    | 380                   |
| TTBK2                  | ND                  | Enzymatic    | 180                   |
| YSK4 <sup>[b]</sup>    | 1.1                 | Enzymatic    | 51                    |

<sup>a</sup> All kinase assays executed at Eurofins unless noted. <sup>b</sup> Evaluated by RBC. <sup>c</sup> Evaluated by SignalChem. <sup>d</sup> Evaluated at SGC-UNC. <sup>e</sup> Not determined.

**Table S3. Crystallographic Data Collection and Refinement Statistics.**

| <b>Complex</b>                                  | TTBK1-AMG28                                                                                            | TTBK1-3                                                                                        | TTBK1-9                                                                                                | TTBK1-10                                                                                               |
|-------------------------------------------------|--------------------------------------------------------------------------------------------------------|------------------------------------------------------------------------------------------------|--------------------------------------------------------------------------------------------------------|--------------------------------------------------------------------------------------------------------|
| <b>PDB accession code</b>                       | 7ZHN                                                                                                   | 7ZHO                                                                                           | 7ZHP                                                                                                   | 7ZHQ                                                                                                   |
| <b>Data Collection</b>                          |                                                                                                        |                                                                                                |                                                                                                        |                                                                                                        |
| Resolution <sup>a</sup> (Å)                     | 48.40-1.85 (1.91-1.85)                                                                                 | 47.48-2.08 (2.15-2.08)                                                                         | 48.47-1.80 (1.86-1.80)                                                                                 | 48.33-1.80 (1.86-1.80)                                                                                 |
| Spacegroup                                      | C 2                                                                                                    | <i>P</i> 2 <sub>1</sub> 2 <sub>1</sub> 2 <sub>1</sub>                                          | C 2                                                                                                    | C 2                                                                                                    |
| Cell dimensions                                 | <i>a</i> = 171.8, <i>b</i> = 39.6, <i>c</i> = 49.7 Å<br><i>α</i> , <i>γ</i> = 90.0°, <i>β</i> = 103.2° | <i>a</i> = 39.4, <i>b</i> = 49.4, <i>c</i> = 171.1 Å<br><i>α</i> , <i>β</i> , <i>γ</i> = 90.0° | <i>a</i> = 172.3, <i>b</i> = 39.8, <i>c</i> = 49.8 Å<br><i>α</i> , <i>γ</i> = 90.0°, <i>β</i> = 103.2° | <i>a</i> = 171.3, <i>b</i> = 39.5, <i>c</i> = 49.7 Å<br><i>α</i> , <i>γ</i> = 90.0°, <i>β</i> = 103.2° |
| No. unique reflections <sup>a</sup>             | 28,144 (2,758)                                                                                         | 20,721 (1,914)                                                                                 | 30,838 (2,992)                                                                                         | 30,388 (2,961)                                                                                         |
| Completeness <sup>a</sup> (%)                   | 100.0 (99.9)                                                                                           | 99.0 (96.9)                                                                                    | 100.0 (100.0)                                                                                          | 100.0 (100.0)                                                                                          |
| <i>I</i> / <i>σ</i> <sup>a</sup>                | 13.4 (1.9)                                                                                             | 12.5 (2.1)                                                                                     | 15.2 (2.0)                                                                                             | 13.4 (2.0)                                                                                             |
| <i>R</i> <sub>merge</sub> <sup>a</sup>          | 0.086 (0.884)                                                                                          | 0.145 (0.998)                                                                                  | 0.071 (0.852)                                                                                          | 0.085 (0.780)                                                                                          |
| CC (1/2)                                        | 0.999 (0.773)                                                                                          | 0.998 (0.740)                                                                                  | 0.999 (0.817)                                                                                          | 0.999 (0.829)                                                                                          |
| Redundancy <sup>a</sup>                         | 6.7 (6.4)                                                                                              | 11.7 (9.5)                                                                                     | 6.7 (6.8)                                                                                              | 6.7 (6.4)                                                                                              |
| <b>Refinement</b>                               |                                                                                                        |                                                                                                |                                                                                                        |                                                                                                        |
| No. atoms in refinement (P/L/O) <sup>b</sup>    | 2,418/ 25/ 225                                                                                         | 2,419/ 22/ 172                                                                                 | 2,399/ 27/ 238                                                                                         | 2,415/ 26/ 224                                                                                         |
| B factor (P/L/O) <sup>b</sup> (Å <sup>2</sup> ) | 32/ 21/ 38                                                                                             | 37/ 30/ 39                                                                                     | 33/ 23/ 39                                                                                             | 27/ 19/ 33                                                                                             |
| <i>R</i> <sub>fact</sub> (%)                    | 19.0                                                                                                   | 19.6                                                                                           | 17.7                                                                                                   | 17.4                                                                                                   |
| <i>R</i> <sub>free</sub> (%)                    | 21.5                                                                                                   | 25.8                                                                                           | 21.8                                                                                                   | 21.2                                                                                                   |
| rms deviation bond <sup>c</sup> (Å)             | 0.014                                                                                                  | 0.012                                                                                          | 0.013                                                                                                  | 0.014                                                                                                  |
| rms deviation angle <sup>c</sup> (°)            | 1.5                                                                                                    | 1.3                                                                                            | 1.4                                                                                                    | 1.5                                                                                                    |

<sup>a</sup> Values in brackets show the statistics for the highest resolution shells. <sup>b</sup> P/O indicate protein, ligand and others (water and solvent molecules), respectively. <sup>c</sup> rms indicates root-mean-square.

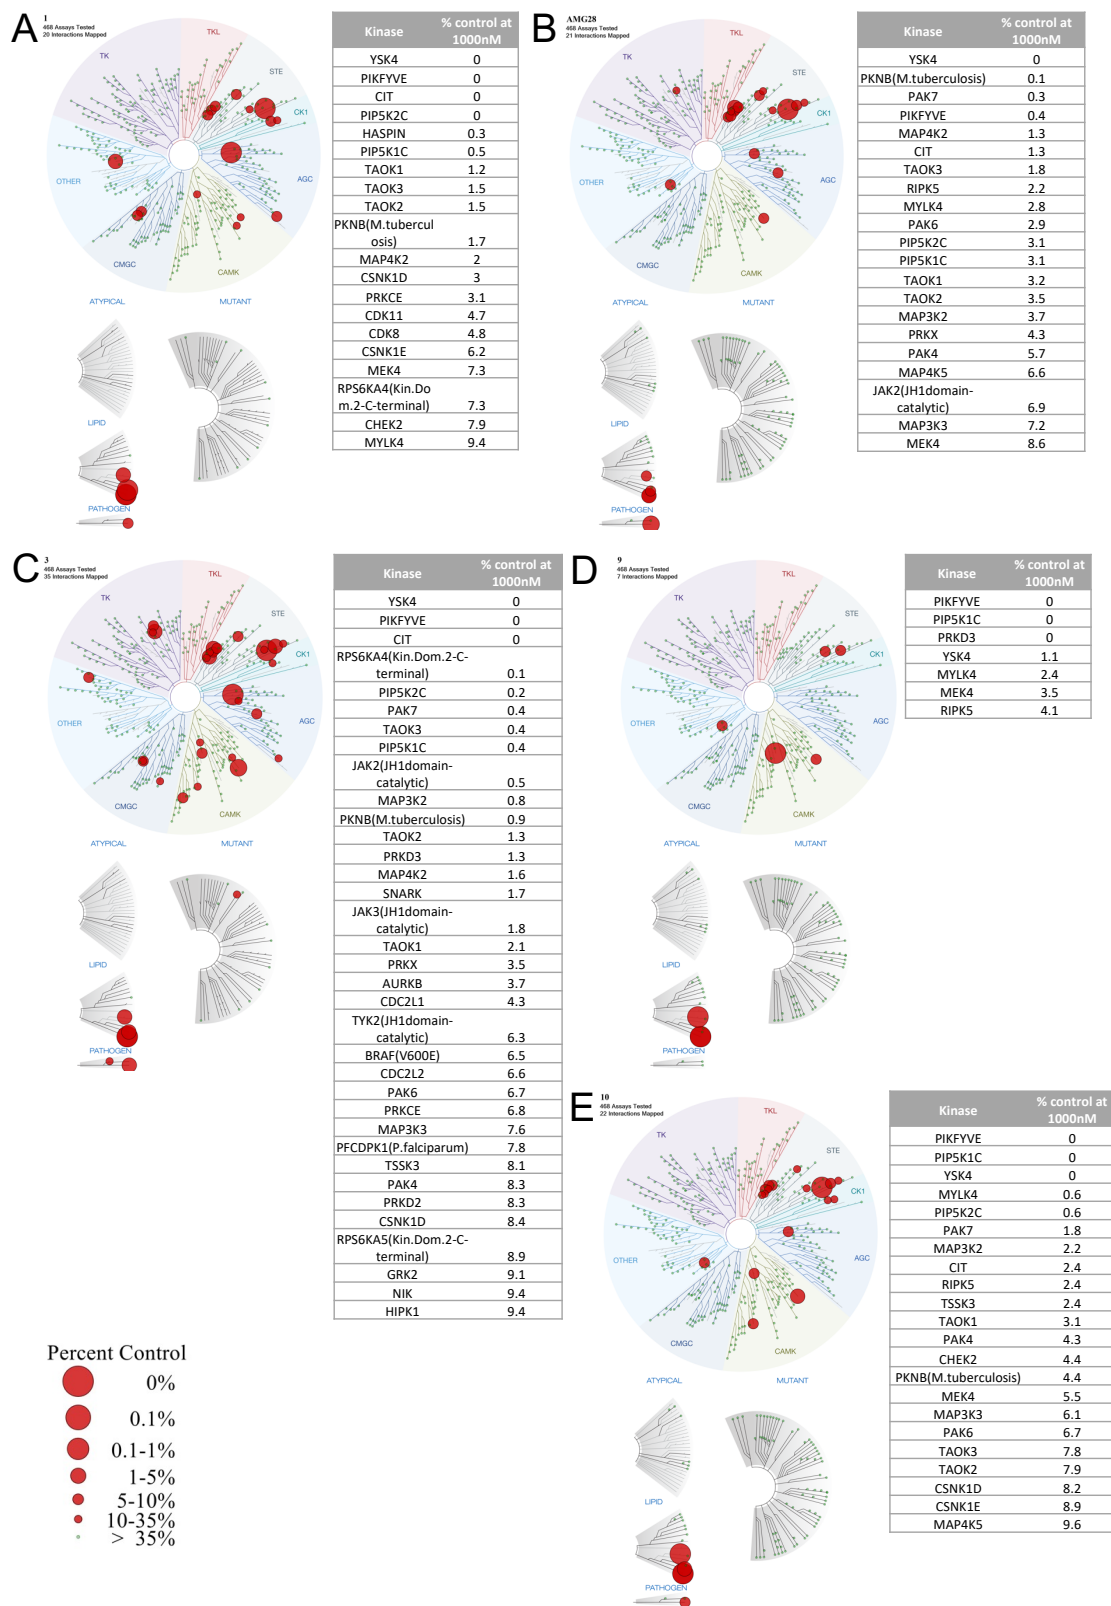

**Figure S1. Kinases that Bind with PoC <10 at 1  $\mu$ M in scanMAX Assay Panel at DiscoverX, Related to Selectivity Data in Table 1**

(A) 1, (B) AMG28, (C) 3, (D) 9, and (E) 10. The TREEspot kinase interaction mapping software from DiscoverX to prepare the kinome trees (<http://treespot.discoverx.com>).

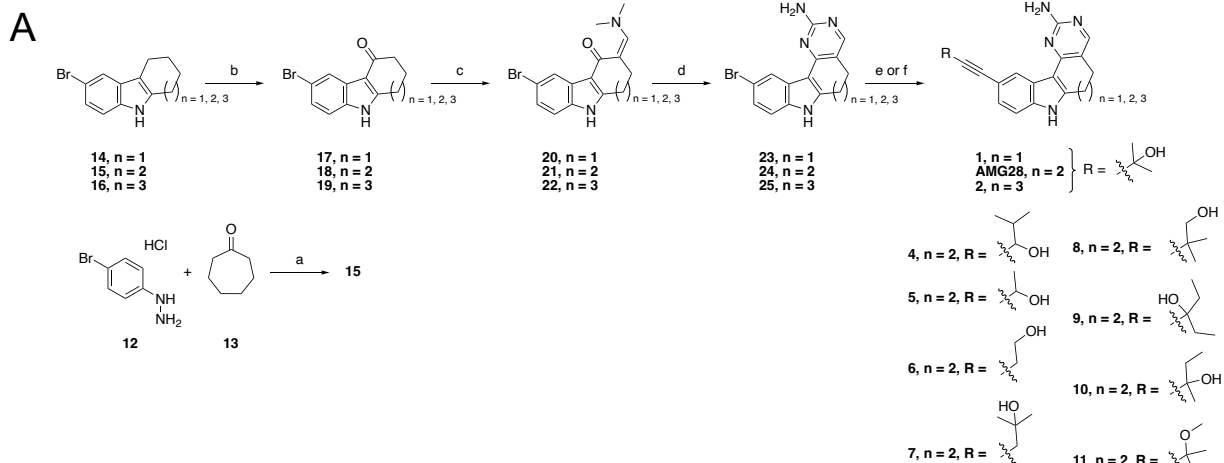

Reagents and conditions: (a) AcOH, 50 °C to 120 °C, 3 h, 70%; (b) DDQ, THF/water, 0 °C, 45 min, 53–87%; (c) Bredereck's reagent, toluene or neat, 110 °C, 3–12 h; (d) NaOMe, guanidine hydrochloride, iPrOH, 100 °C, 12 h, 12–38% over 2 steps; (e) For **1**, **2**, **4**, and AMG28: Alkyne R, TEA, Pd(PPh<sub>3</sub>)<sub>4</sub>, CuI, DMF or DMA, 100 °C, 12 h, 1.6–19%; (f) For **5–11**: Alkyne R, DIPA, PdCl<sub>2</sub>(PPh<sub>3</sub>)<sub>2</sub>, CuI, propanol, 100 °C, 12 h, 2.4–15%.

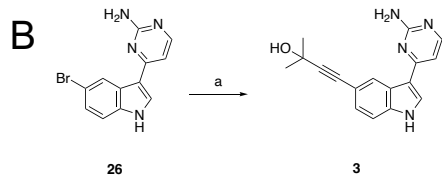

Reagents and conditions: (a) 2-methylbut-3-yn-2-ol, TEA, Pd(PPh<sub>3</sub>)<sub>4</sub>, CuI, DMA, 100 °C, 12 h, 4.4%.

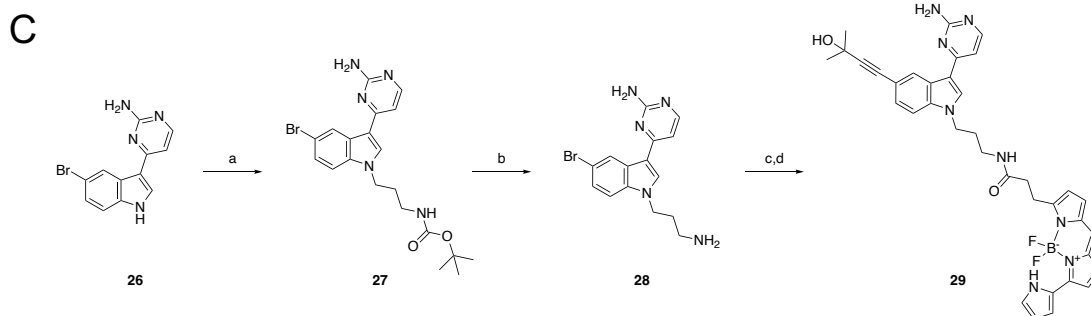

Reagents and conditions: (a) Tos(CH<sub>2</sub>)<sub>3</sub>NHBoc, Cs<sub>2</sub>CO<sub>3</sub>, DMF, 50 °C, 16 h, 35%; (b) TFA, DCM, 2 h, 95%; (c) 2-methylbut-3-yn-2-ol, Pd(PPh<sub>3</sub>)<sub>4</sub>, diisopropylamine, CuI, 80 °C, 16 h; (d) NanoBRET590 SE, DIPEA, DMF, 30 min, 0.9% over two steps.

**Figure S2. Schemes Corresponding to Synthesis of all Analogs and Tracer 29.**

(A) Route and reagents used to prepare analogs **1**, **2**, **4–11**, and AMG28. (B) Route and reagents used to prepare analog **3**. (C) Route and reagents used to prepare tracer **29**.

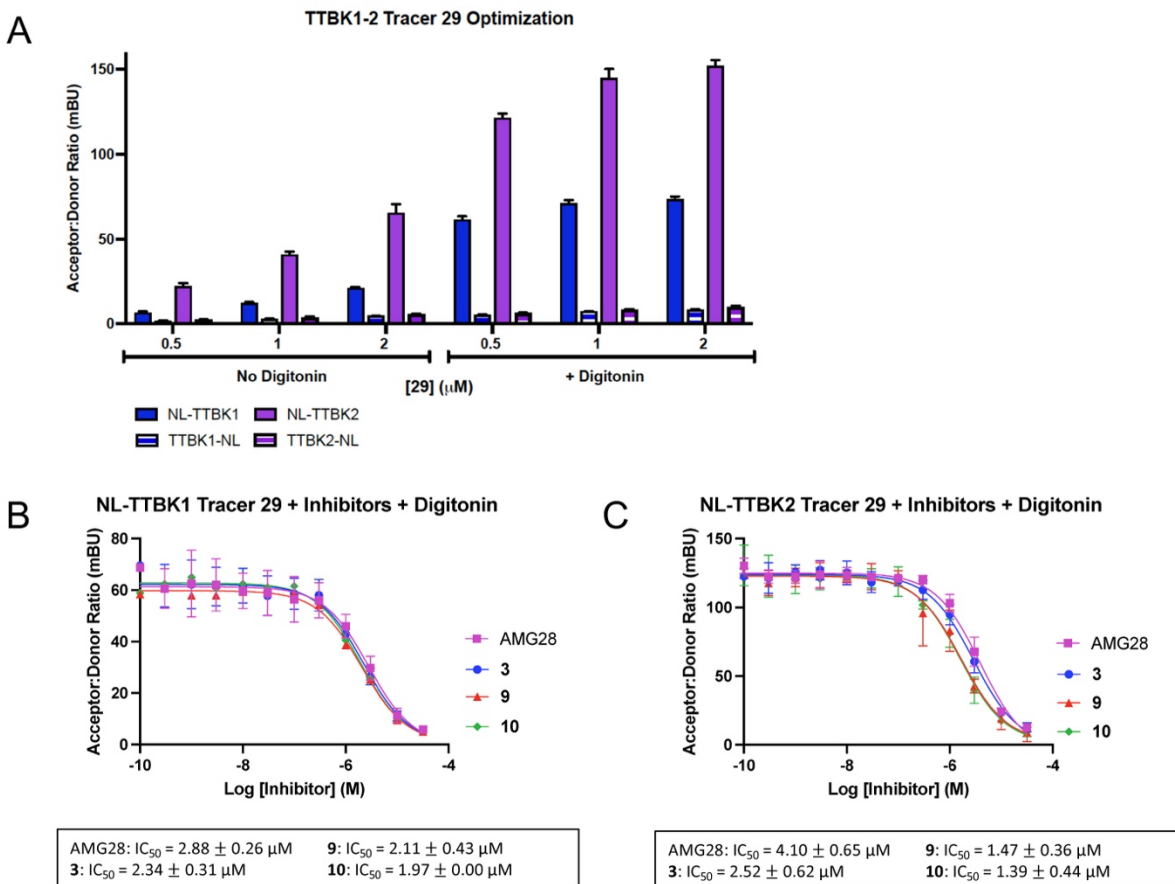

**Figure S3. NanoBRET Data Exploring Cell Permeability of Tracer 29.**

(A) Permeation studies for tracer **29** in the presence and absence of digitonin and identification of the optimal NLuc-tagged construct for TTBK1 and TTBK2, n = 2. Error bars represent standard deviation.

(B) Representative NLuc-TTBK1 NanoBRET assay curves and corresponding IC<sub>50</sub> values for active compounds AMG28, **3**, **9**, and **10** in permeabilized HEK293 cells, n = 2. Error is reported as standard error mean (SEM) (C) Representative NLuc-TTBK2 NanoBRET assay curves and corresponding IC<sub>50</sub> values for active compounds AMG28, **3**, **9**, and **10** in permeabilized HEK293 cells, n = 3. Error is reported as SEM.

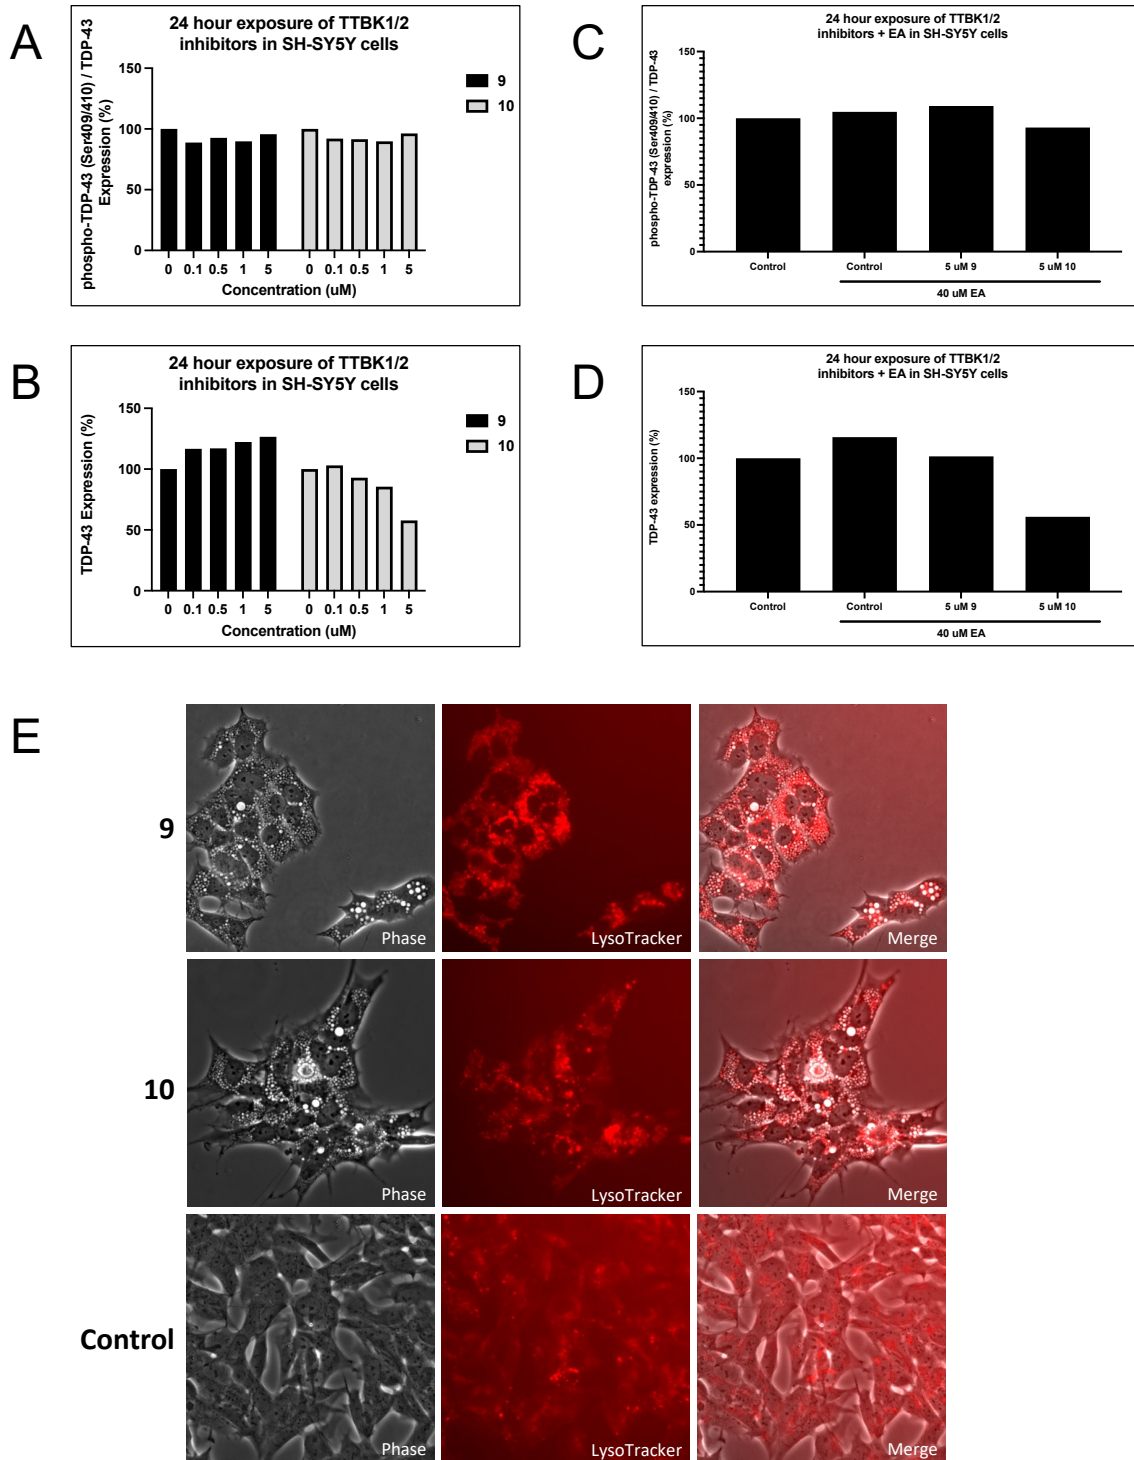

**Figure S4. Western blot and Imaging Analyses of SH-SY5Y cells after 24 h Treatment with 9 or 10 with and without the Addition of EA.**

(A) Quantification of phospho-TDP-43 (Ser409/410, normalized to total TDP-43) after treatment in dose-response, n = 1. (B) Quantification of total TDP-43 after treatment in dose-response, n = 1. (C) Quantification of phospho-TDP-43 (Ser409/410, normalized to total TDP-43) after treatment with 5 μM compound and 40 μM EA, n = 1. (D) Quantification of total TDP-43 after treatment with 5 μM compound and 40 μM EA, n = 1. (E) 50 nM LysoTracker was added after 24 h treatment with 5 μM 9 or 10 and imaged at 40X. Unformatted images of blots are included in Figure S9.

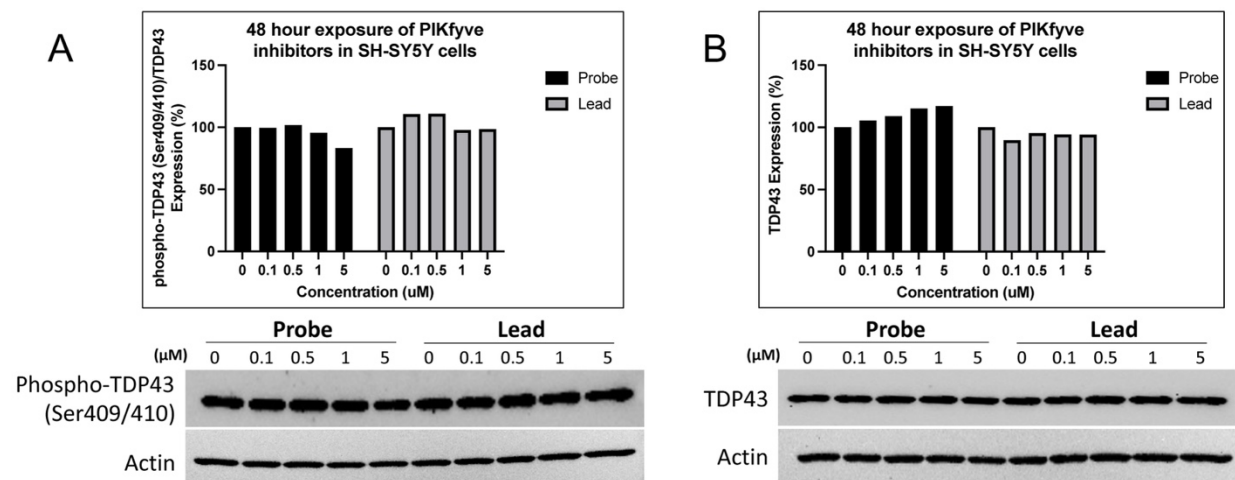

**Figure S5. Western blot Analyses of SH-SY5Y cells after 48 h Treatment with PIKfyve chemical probe and PIKfyve lead compound.**

(A) Western blots and quantification of phospho-TDP-43 (Ser409/410) expression, normalized to total TDP-43) after treatment in dose response,  $n = 1$ . (B) Western blots and quantification of total TDP-43 after treatment in dose response,  $n = 1$ . Corresponding compound numbers reported in Drewry et al are PIKfyve lead compound = **8** and PIKfyve chemical probe = **17**.<sup>1</sup> Unformatted images of blots are included in Figure S10.



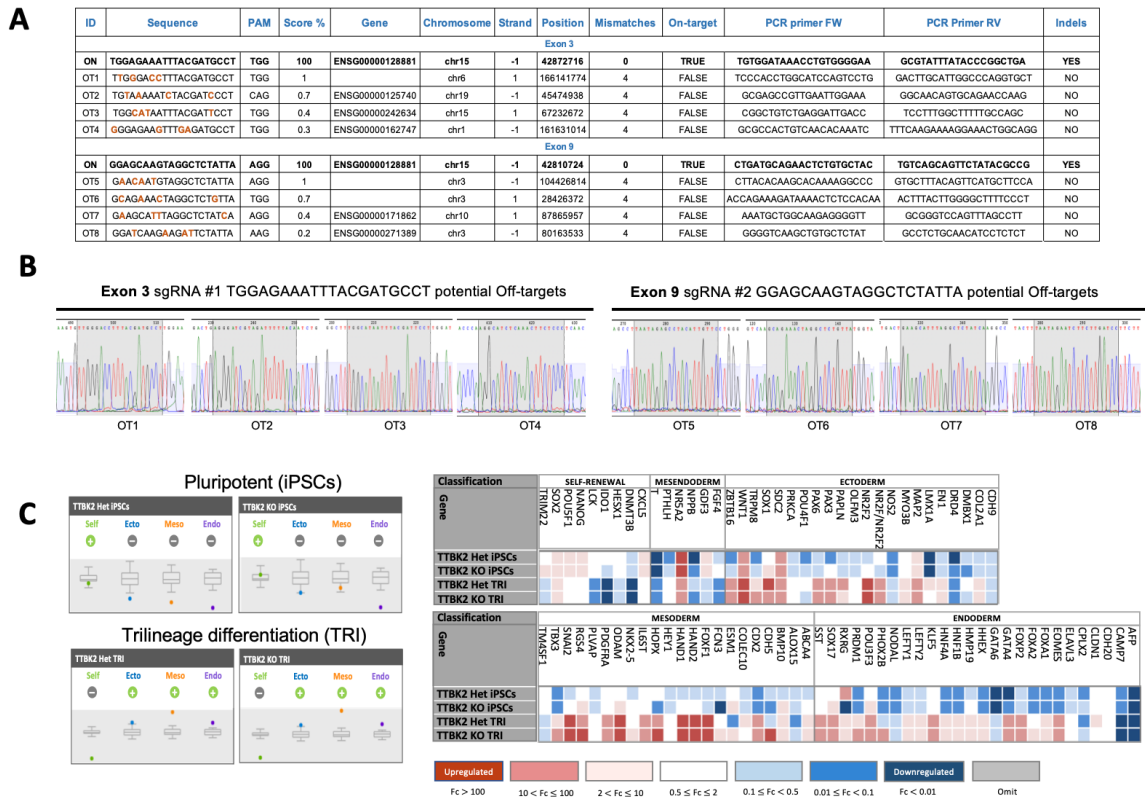

**Figure S6. Generation and characterization of TTBK2 knockout iPSCs using CRISPR/Cas9.**

(A) Table showing the top four sequence-based predicted off-targets of each guide RNA, which includes on-target score as a percentage, gene Ensembl ID, chromosome location, strand, genomic position on specific exons, on-target prediction (true/false), and forward and reverse primer sequences for PCR amplification. (B) Sanger sequencing of predicted off-targets shows the unmodified genomic sequences of predicted off-targets. (C) Pluripotent Taqman Scorecard analysis of homozygous (TTBK2 KO) and heterozygous (TTBK2 Het) edited cells in a pluripotent state (Pluripotent (iPSCs)) and differentiated into the three germ layers (Trilineage differentiation (TRI)). The left panel summarizes the results of gene expression for self-renewal (Self), ectoderm (Ecto), mesoderm (Meso), and endoderm (Endo) markers. The right panel shows a gene expression heatmap containing all individual markers.

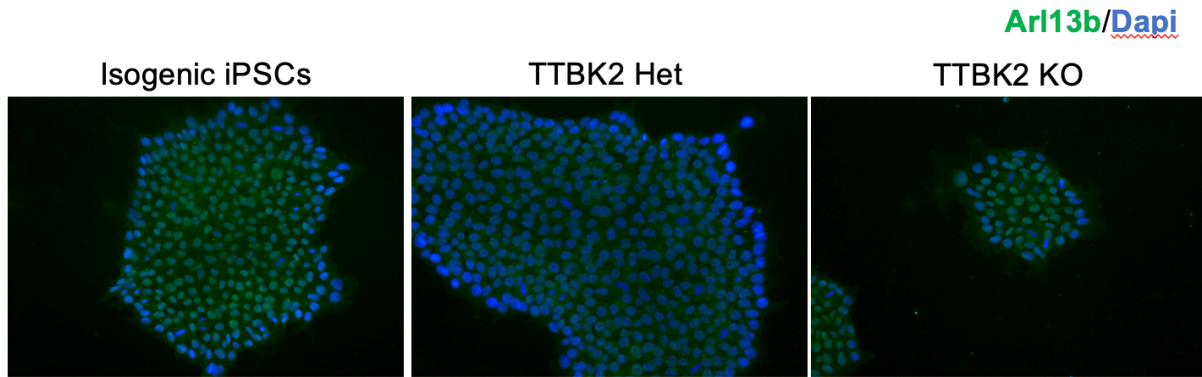

**Figure S7. Primary cilia expression on TTBK2 edited clones without starvation.**

Immunofluorescent staining to visualize cilia on human isogenic iPSCs, TTBK2 Het cells, and TTBK2 KO cells under standard culture conditions. A legend of the stains used to visualize cilia and nuclei is placed above the panels. Primary cilia are labeled with the Arl13B antibody (green) and the nuclei with DAPI (blue). Images were captured at 10X.

**REPLICATE 1 RAW IMAGES:** 48 hour exposure of TTBK1/2 inhibitors in SH-SY5Y cells

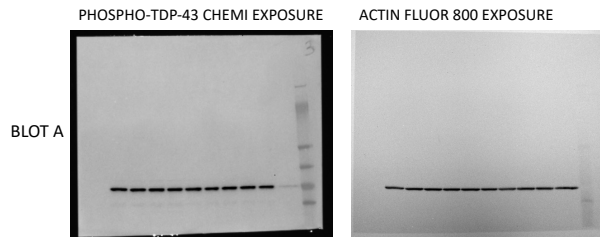

**REPLICATE 2 RAW IMAGES:** 48 hour exposure of TTBK1/2 inhibitors in SH-SY5Y cells

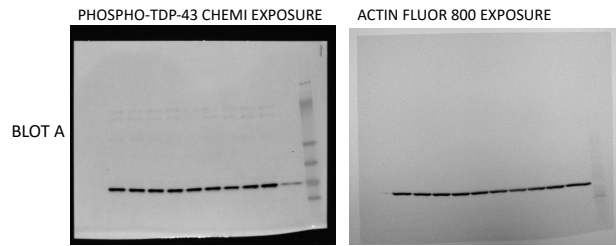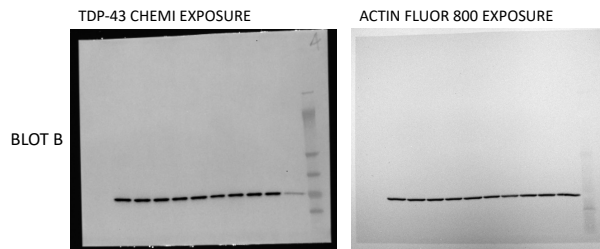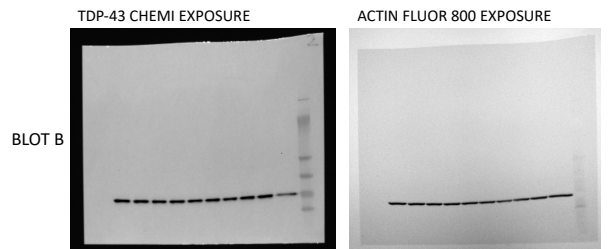

**REPLICATE 3 RAW IMAGES:** 48 hour exposure of TTBK1/2 inhibitors in SH-SY5Y cells

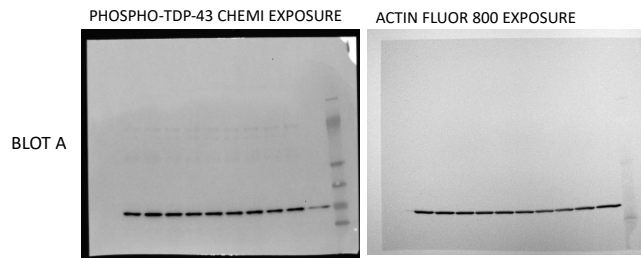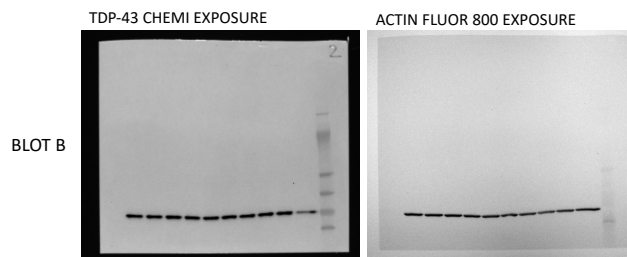

**Figure S8. Unformatted western blot images corresponding to Figure 4.**

**RAW IMAGES FOR FIGURE S2 A&B:** 24 hour exposure of TTBK1/2 inhibitors in SH-SY5Y cells

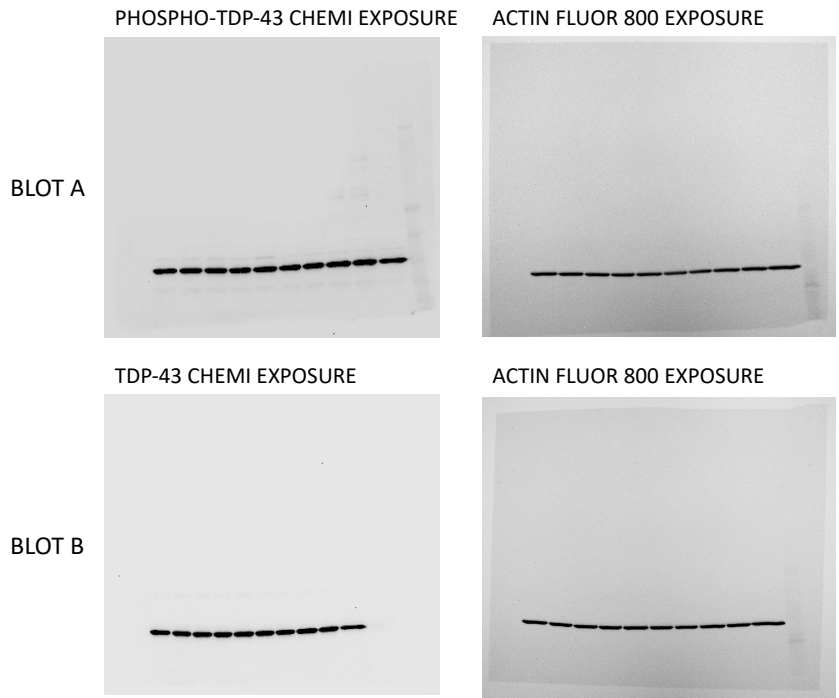

**RAW IMAGES FOR FIGURE S2 C&D:** 24 hour exposure of TTBK1/2 inhibitors in SH-SY5Y cells

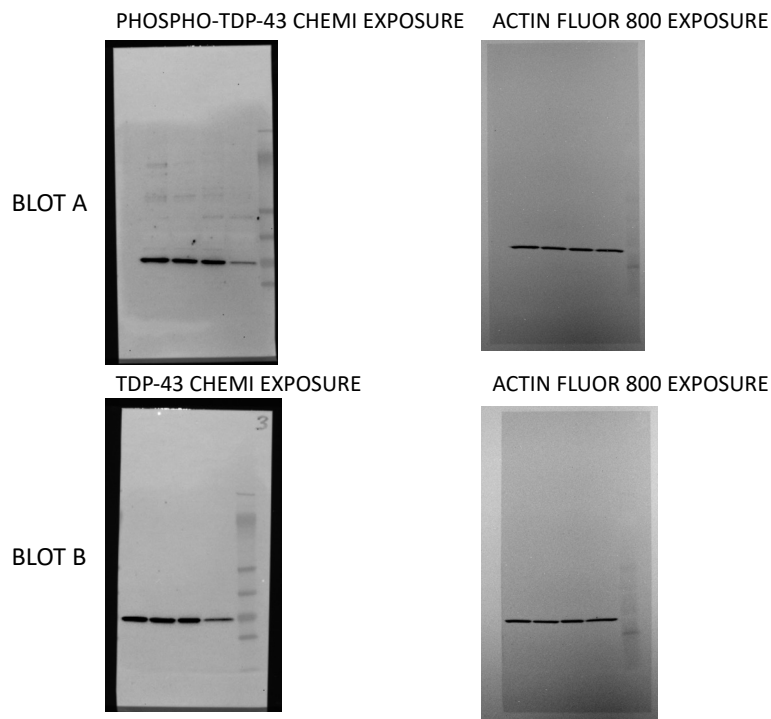

**Figure S9. Unformatted western blot images corresponding to Figure S4.**

**RAW IMAGES:** 48 hour exposure of PIKFYVE inhibitors in SH-SY5Y cells

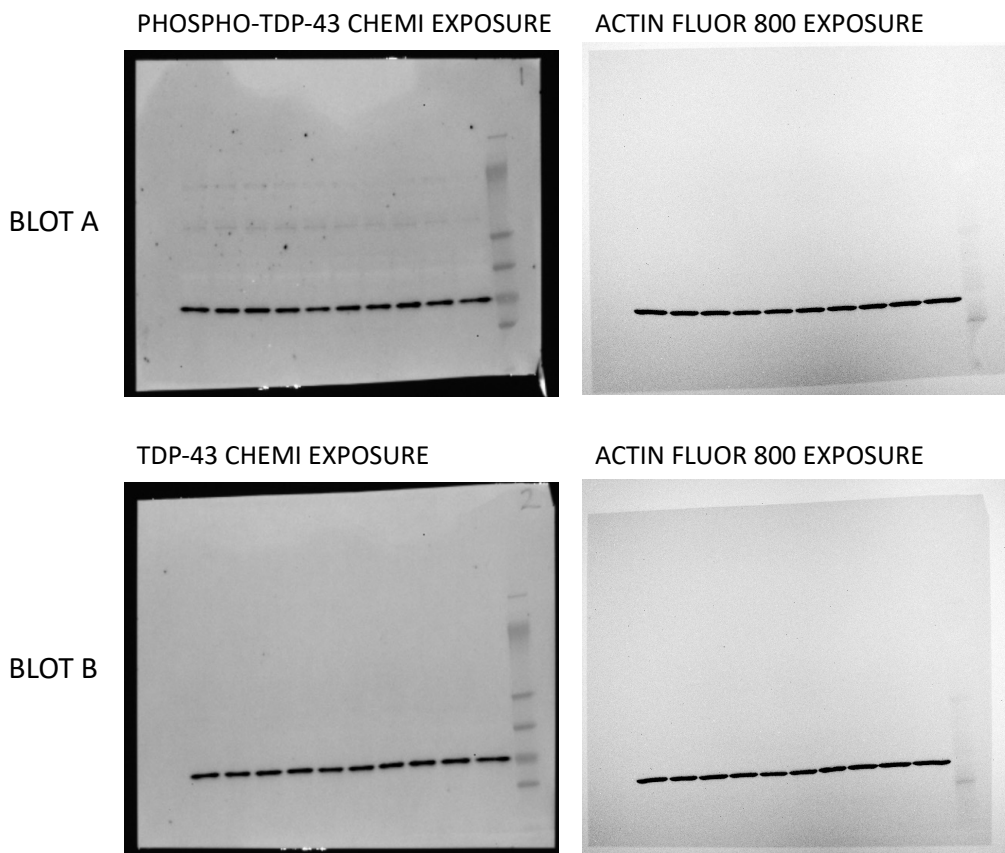

**Figure S10. Unformatted western blot images corresponding to Figure S5.**

## Chemistry Experimental

### General Information for Chemical Synthesis.

Reagents were obtained from verified suppliers and employed without purification. Temperatures are in degrees Celsius (°C); solvent was removed using a rotary evaporator; and thin layer chromatography as well as LC–MS were used to monitor reaction progress. <sup>1</sup>H NMR and additional analytical data was collected for intermediates and final compounds to verify their identity and evaluate their purity. <sup>1</sup>H and <sup>13</sup>C NMR spectra were obtained in DMSO-*d*<sub>6</sub> or MeOD-*d*<sub>4</sub> and recorded using Bruker spectrometers. Magnet strength is listed in each experimental write-up along with peak positions in parts per million (ppm). Peaks in NMR spectra are calibrated versus the shift of the indicated deuterated solvent and coupling constants (*J* values) are reported in hertz (Hz). Peak multiplicities are included as follows: singlet (s), doublet (d), doublet of doublets (dd), triplet (t), pentet (p), and multiplet (m). Purity of all compounds was assessed via HPLC.

Preparation of AMG28 as well as analogs **4–11** began with Fischer indole synthesis to produce **15**. Synthesis of analogs **1** and **2** was made possible from commercially available indoles **14** and **16**, respectively. Intermediates **17–19** were accessed from indoles **14–15** via selective oxidation with DDQ. Next, intermediates **20–22** were synthesized from **17–19** by refluxing with Brederick's reagent and then cyclized to the corresponding aminopyrimidines **23–25** using guanidine. The desired TTBK inhibitors **1**, **2**, **4–11**, and AMG28 were synthesized from **23–25** via Sonogashira coupling conditions (Figure S3). In analogous fashion, inhibitor **3** was accessed from commercially available indole **26** using Sonogashira coupling conditions (Figure S3). Full synthetic procedures and compound characterization are included in a separate manuscript.<sup>1</sup> <sup>1</sup>H NMR data and spectra for the cell-active TTBK inhibitors are included below to confirm identity.

Preparation of Tracer **29** began with N-alkylation of the indole nitrogen of commercially available indole **26** with a Boc-protected propyl amine to produce **27**. Next, acidic conditions promoted the liberation of the pendant amine in intermediate **28**. A two-step sequence was employed to first install the desired alkyne bearing a propargylic alcohol via Sonogashira coupling conditions, and then attach the NanoBRET 590 dye under basic conditions and yield final tracer **29** (Figure S3). It is worth noting that the propargylic alcohol is acid labile and should not be exposed to acidic conditions, even during purification. Full characterization of the final tracer is included.

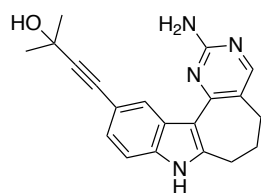

**AMG28**

4-(2-amino-5,6,7,8-tetrahydropyrimido[4',5':3,4]cyclohepta[1,2-b]indol-11-yl)-2-methylbut-3-yn-2-ol (AMG28). The analytical data for AMG28 matches that previously published.<sup>1,2</sup> <sup>1</sup>H NMR (400 MHz, DMSO-*d*<sub>6</sub>) δ 11.61 (s, 1H), 8.71 (s, 1H), 8.29 (s, 1H), 7.92 (s, 1H), 7.26 (d, *J* = 8.3 Hz, 1H), 7.11 (dd, *J* = 8.4, 1.6 Hz, 1H), 6.20 (s, 2H), 3.19 – 3.15 (m, 2H), 2.66 – 2.59 (m, 2H), 1.98 – 1.92 (m, 2H), 1.50 (s, 6H).

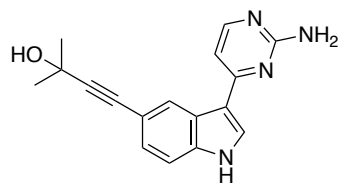

**3**

4-(3-(2-aminopyrimidin-4-yl)-1H-indol-5-yl)-2-methylbut-3-yn-2-ol (**3**). The analytical data for **3** matches that previously published.<sup>1,3</sup> <sup>1</sup>H NMR (400 MHz, DMSO-*d*<sub>6</sub>) δ 11.83 (s, 1H), 8.56 (s, 1H), 8.15 – 8.09 (m, 2H), 7.41 (d, *J* = 8.4 Hz, 1H), 7.17 (d, *J* = 8.9 Hz, 1H), 7.01 (d, *J* = 5.3 Hz, 1H), 6.50 (s, 2H), 1.50 (s, 6H).

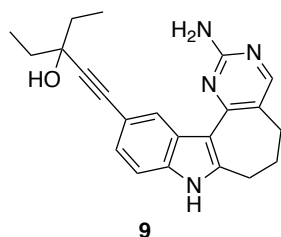

9

1-(2-amino-5,6,7,8-tetrahydropyrimido[4',5':3,4]cyclohepta[1,2-b]indol-11-yl)-3-ethylpent-1-yn-3-ol (**9**). The analytical data for **9** matches that previously published.<sup>1</sup> <sup>1</sup>H NMR (400 MHz, DMSO-*d*<sub>6</sub>) δ 11.60 (s, 1H), 8.70 (d, *J* = 1.6 Hz, 1H), 7.27 (d, *J* = 8.3 Hz, 1H), 7.13 (dd, *J* = 8.2, 1.6 Hz, 1H), 6.14 (s, 2H), 5.02 (s, 1H), 3.17 (t, *J* = 6.5 Hz, 2H), 2.66 – 2.59 (m, 2H), 1.97 (dd, *J* = 10.5, 5.5 Hz, 2H), 1.75 – 1.56 (m, 4H), 1.03 (t, *J* = 7.4 Hz, 6H).

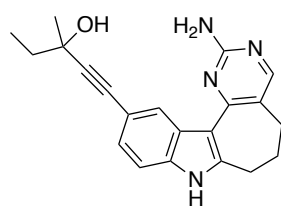

10

1-(2-amino-5,6,7,8-tetrahydropyrimido[4',5':3,4]cyclohepta[1,2-b]indol-11-yl)-3-methylpent-1-yn-3-ol (**10**). The analytical data for **10** matches that previously published.<sup>1</sup> <sup>1</sup>H NMR (400 MHz, DMSO-*d*<sub>6</sub>) δ 11.60 (s, 1H), 8.71 (s, 1H), 8.16 (d, *J* = 2.2 Hz, 1H), 7.92 (s, 1H), 7.27 (d, *J* = 8.2 Hz, 1H), 7.12 (dd, *J* = 8.3, 1.7 Hz, 1H), 6.17 (s, 2H), 3.17 (t, *J* = 6.6 Hz, 2H), 2.62 (d, *J* = 9.1 Hz, 2H), 1.98 – 1.92 (m, 2H), 1.71 – 1.62 (m, 2H), 1.45 (s, 3H), 1.03 (t, *J* = 7.4 Hz, 3H).

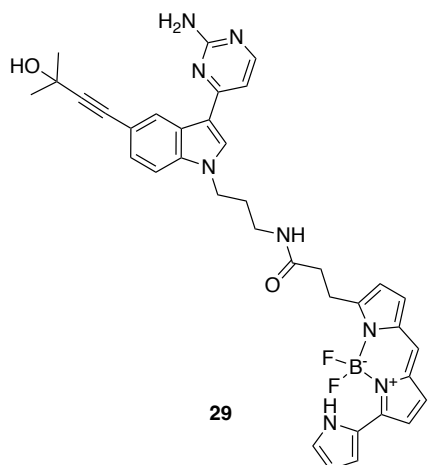

29

*N*-(3-(3-(2-aminopyrimidin-4-yl)-5-(3-hydroxy-3-methylbut-1-yn-1-yl)-1H-indol-1-yl)propyl)-3-(5,5-difluoro-7-(1H-pyrrol-2-yl)-5H-5λ4,6λ4-dipyrrolo[1,2-c:2',1'-f][1,3,2]diazaborinin-3-yl)propenamide (**29**). <sup>1</sup>H NMR (400 MHz, MeOD-*d*<sub>4</sub>) δ 8.58 – 8.56 (m, 1H), 8.01 (d, *J* = 5.5 Hz, 1H), 7.99 (s), 7.37 (dd, *J* = 8.6, 0.8 Hz, 1H), 7.24 (dd, *J* = 8.5, 1.6 Hz, 1H), 7.21 – 7.17 (m, 2H), 7.14 (d, *J* = 4.6 Hz, 1H), 7.12 (s, 1H), 6.99 (d, *J* = 4.6 Hz, 1H), 6.95 (d, *J* = 5.5 Hz, 1H), 6.87 (d, *J* = 3.9 Hz, 1H), 6.36 – 6.33 (m, 2H), 4.14 (t, *J* = 7.0 Hz, 2H), 3.23 (t, *J* = 6.5 Hz, 2H), 2.67 (t, *J* = 7.5 Hz, 2H), 2.03 (p, *J* = 6.8 Hz, 2H), 1.60 (s, 6H). LCMS: calculated for C<sub>36</sub>H<sub>36</sub>BF<sub>2</sub>N<sub>8</sub>O<sub>2</sub> [M + H]<sup>+</sup>: 661.30. Found: 661.34.

## <sup>1</sup>H Spectra for Final Compounds

<sup>1</sup>H NMR (400 MHz, MeOD-*d*<sub>4</sub>) 4-(2-amino-5,6,7,8-tetrahydropyrimido[4',5':3,4]cyclohepta[1,2-b]indol-11-yl)-2-methylbut-3-yn-2-ol (AMG28):

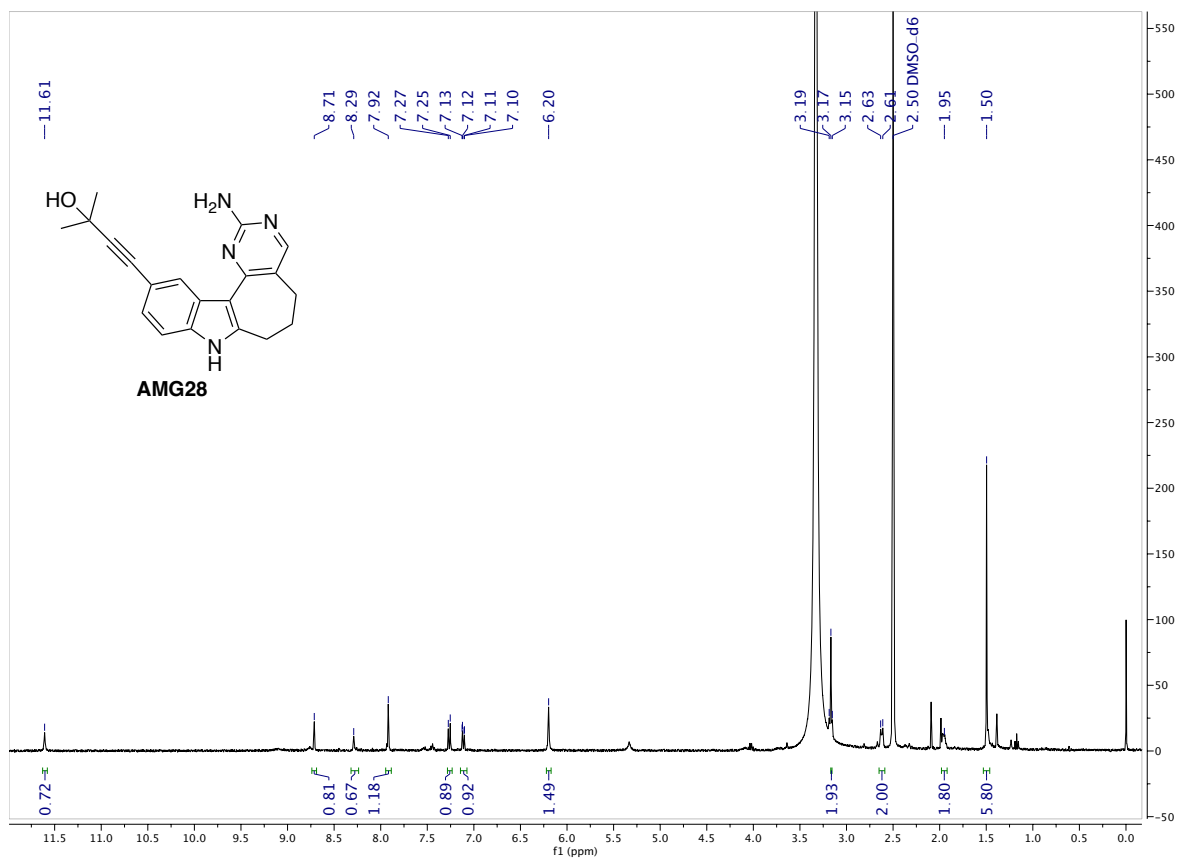



$^1\text{H}$  NMR (400 MHz,  $\text{MeOD-}d_4$ ) 4-(3-(2-aminopyrimidin-4-yl)-1H-indol-5-yl)-2-methylbut-3-yn-2-ol (**3**):

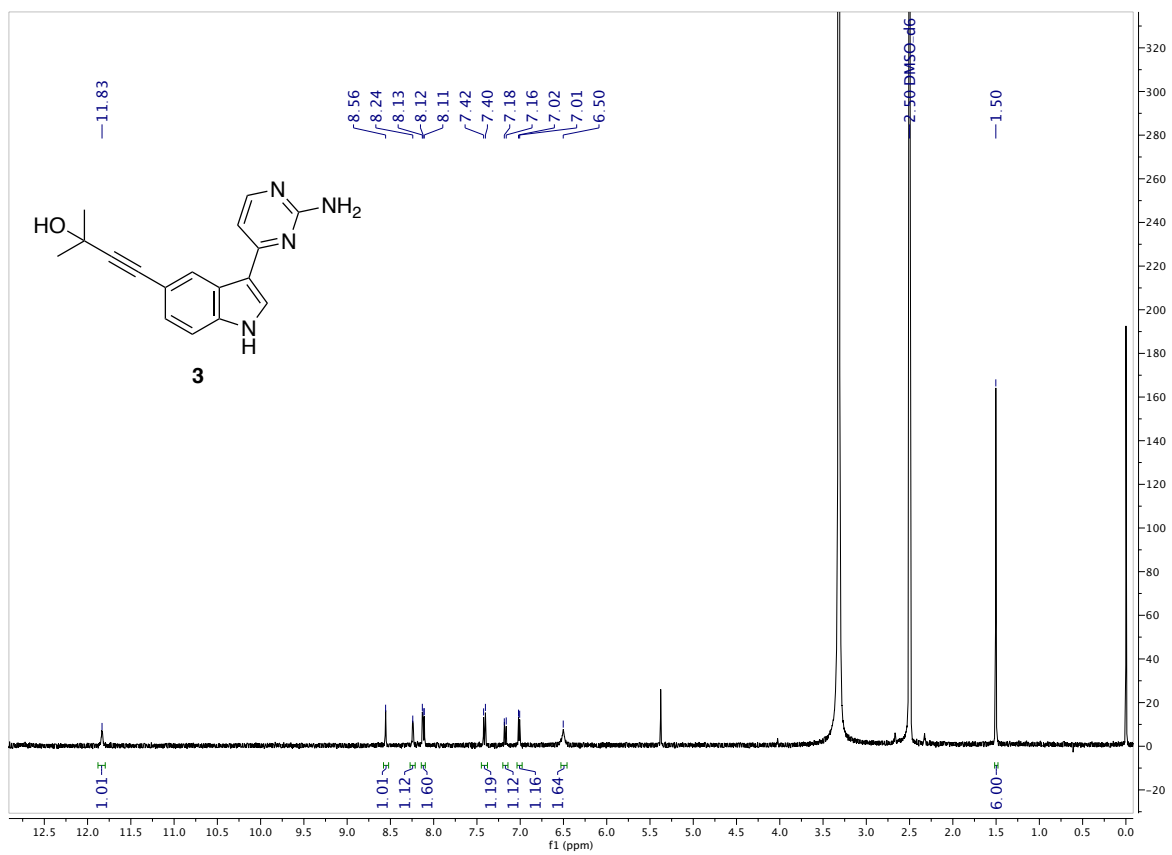

<sup>1</sup>H NMR (400 MHz, DMSO-d<sub>6</sub>) 1-(2-amino-5,6,7,8-tetrahydropyrimido[4',5':3,4]cyclohepta[1,2-b]indol-11-yl)-3-ethylpent-1-yn-3-ol (**9**):

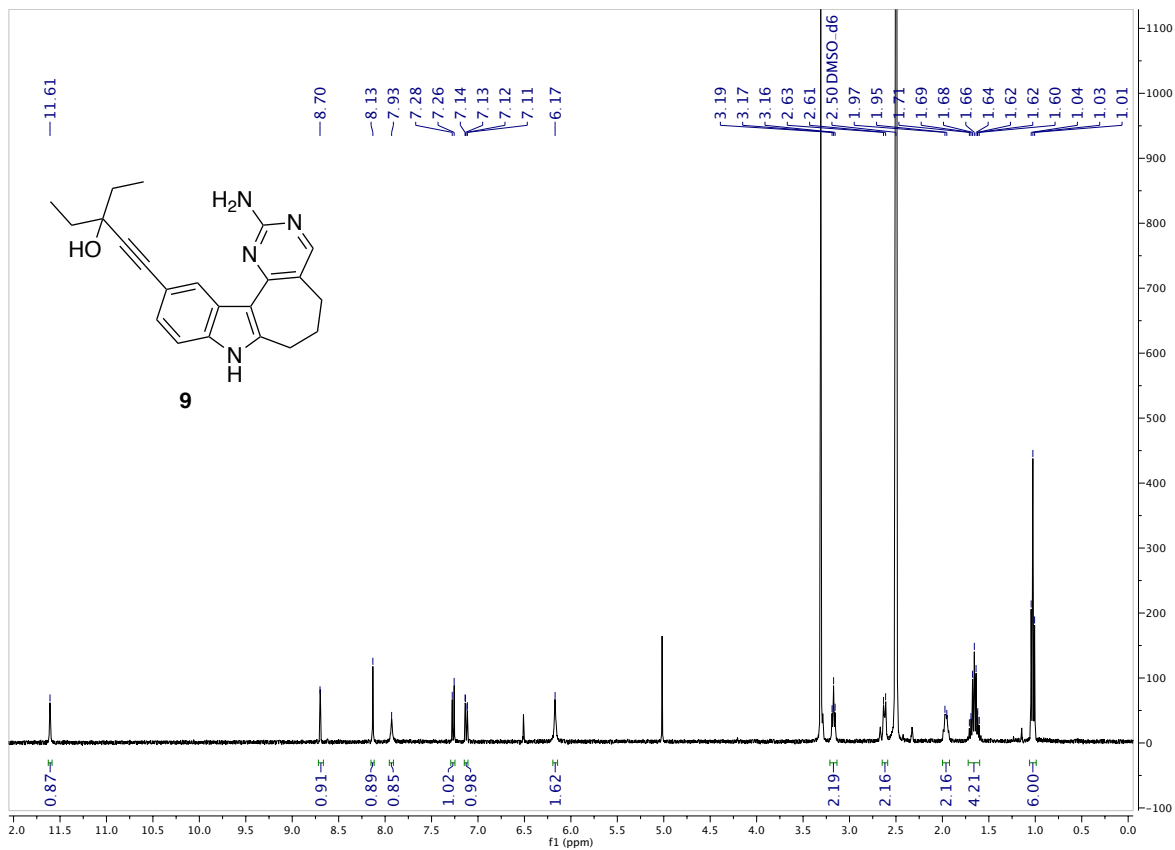

$^1\text{H}$  NMR (400 MHz,  $\text{MeOD-}d_4$ ) 1-(2-amino-5,6,7,8-tetrahydropyrimido[4',5':3,4]cyclohepta[1,2-b]indol-11-yl)-3-methylpent-1-yn-3-ol (**10**):

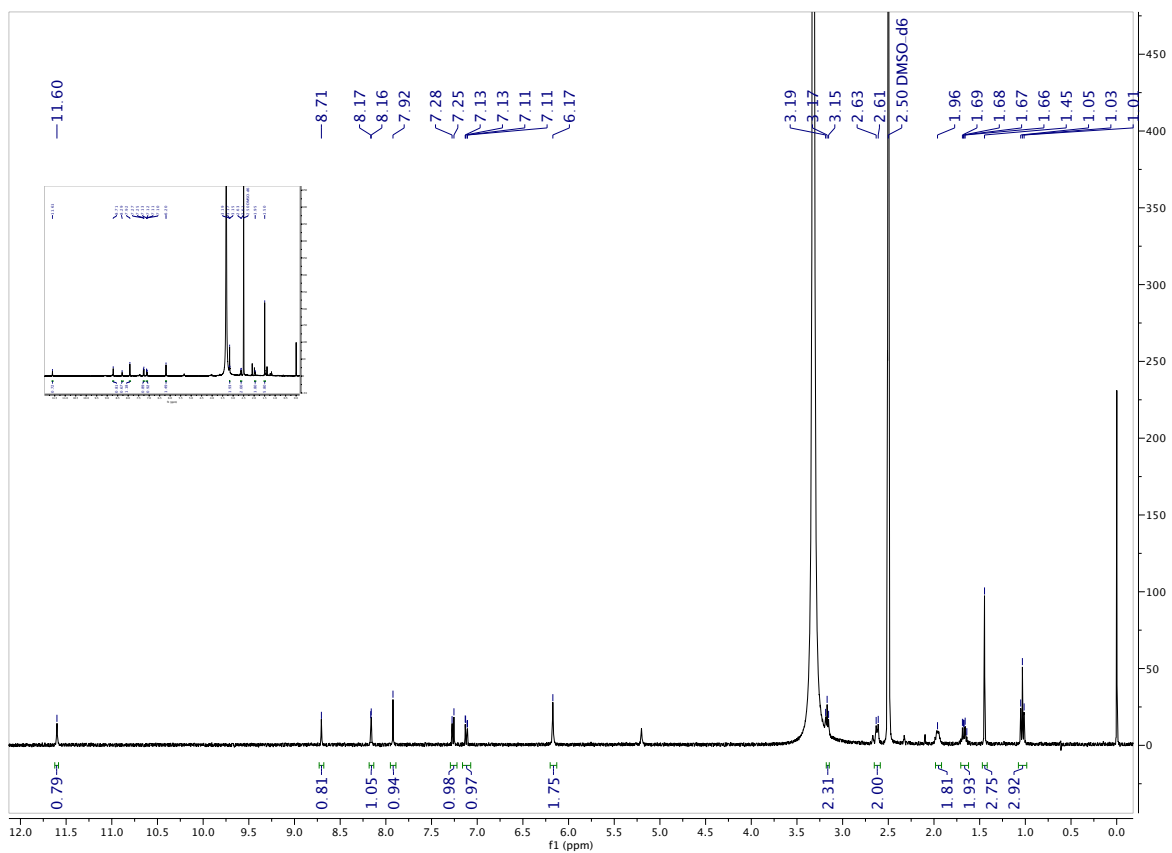

<sup>1</sup>H NMR (400 MHz, MeOD-*d*<sub>4</sub>) N-(3-(3-(2-aminopyrimidin-4-yl)-5-(3-hydroxy-3-methylbut-1-yn-1-yl)-1H-indol-1-yl)propyl)-3-(5,5-difluoro-7-(1H-pyrrol-2-yl)-5H-5λ4,6λ4-dipyrrolo[1,2-c:2',1'-f][1,3,2]diazaborinin-3-yl)propanamide (**29**):

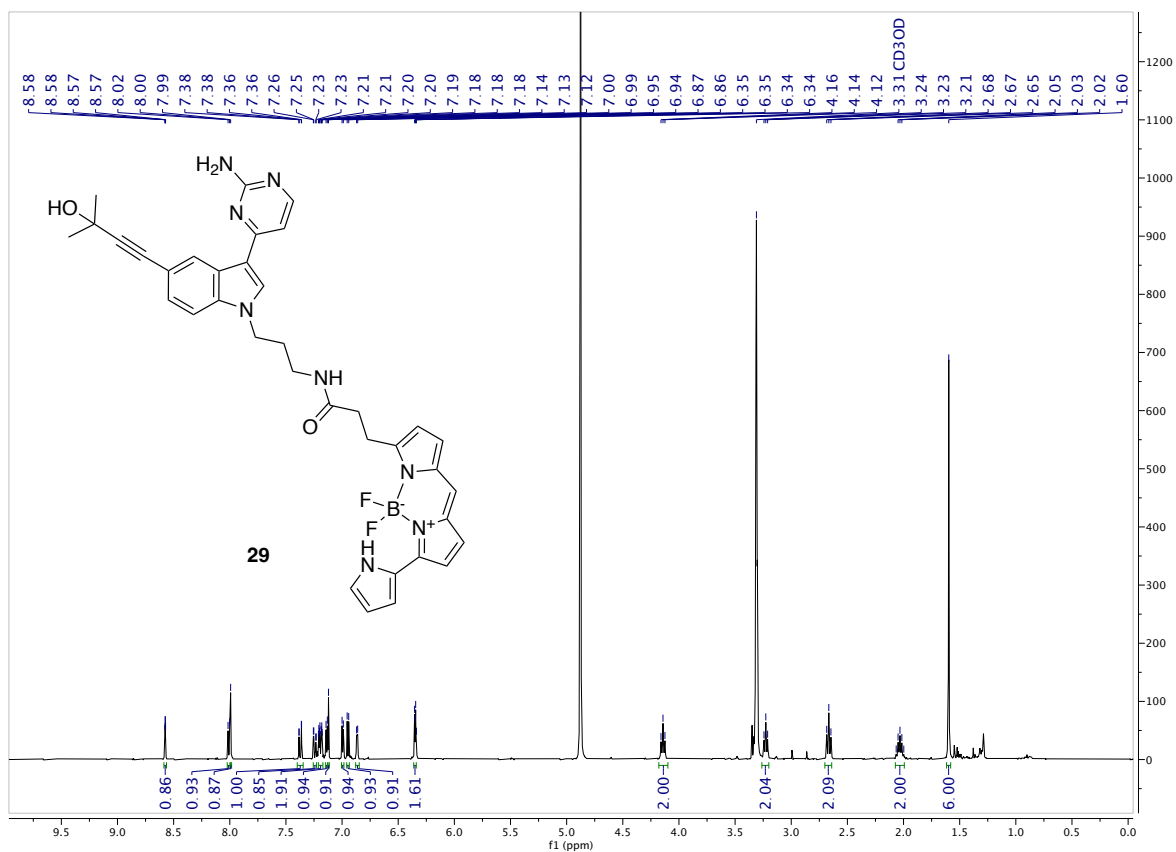

## References

- 1 Drewry, D. H. *et al.* Identification and utilization of a chemical probe to interrogate the roles of PIKfyve in the lifecycle of  $\beta$ -coronaviruses. *J Med Chem*, **65**, 12860–12882. <https://doi.org/10.1021/acs.jmedchem.2c00697> (2022).
- 2 Li, K. *et al.* Inhibiting NF- $\kappa$ B-inducing kinase (NIK): Discovery, structure-based design, synthesis, structure–activity relationship, and co-crystal structures. *Bioorg Med Chem Lett* **23**, 1238–1244. <https://doi.org/10.1016/j.bmcl.2013.01.012> (2013).
- 3 Halkina, T. *et al.* Discovery of potent and brain-penetrant tau tubulin kinase 1 (TTBK1) inhibitors that lower tau phosphorylation in vivo. *J Med Chem* **64**, 6358–6380. <https://doi.org/10.1021/acs.jmedchem.1c00382> (2021).
